# Supplementary material
Source: PubMed Central journal article supplement (PMC3399530)
Supplement: prio-6-282-s01.pdf [file prio-6-282-s01.pdf]

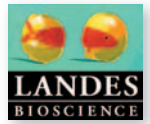

## **Supplemental Material to:**

**Urmila Basu, Luciane M. Almeida, Sandor Dudas, Catherine  
E. Graham, Stefanie Czub, Stephen S. Moore  
and Le Luo Guan**

**Gene expression alterations in rocky mountain  
elk infected with chronic wasting disease**

**Prion 2012; 6(3)**

**<http://dx.doi.org/10.4161/pri.19915>**

**<http://www.landesbioscience.com/journals/prion/article/19915/>**

**Box 1: Differentially expressed genes associated with CWD in Elk. These genes have not been reported to be associated to TSE disease in previous studies.**

Acyloxyacyl hydrolase; Angiopoietin 1; Angiotensin II receptor; ATPase, H<sup>+</sup> transporting, lysosomal 42kDa; Baculoviral IAP repeat-containing 3; Cadherin 18, type 2; Calcyon neuron-specific vesicular protein; Caldesmon 1; Calponin 1; Carboxypeptidase E; Cathelicidin; Caveolin 1; CD163 molecule; CDC28 protein kinase regulatory subunit 2; Ceruloplasmin; Chimerin 1; Cholecystokinin; Common salivary protein BSP30; Complement component 4A; Complement factor B and H; Connective tissue growth factor CTD; Cyclin-dependent kinase inhibitor 1C; Cysteine and glycine-rich protein; Cysteine-rich, angiogenic inducer; Cytokeratin 19; Deleted in malignant brain tumors 1; Destrin; Elongation factor RNA polymerase II; Ermin; Fatty acid binding protein 4; Fibroblast growth factor 12; Fibroblast growth factor-binding protein; Frizzled-related protein; GDP dissociation inhibitor 1; GINS complex subunit 4; GNAS complex locus; Growth hormone receptor; GTP-binding protein 8; Haptoglobin; Heme oxygenase 1; Hemoglobin alpha chain Fc fragment of IgG; Hemoglobin, beta; Intersectin 1; IQ motif containing GTPase activating protein 1; Kv channel interacting protein 4; Mal, T-cell differentiation protein 2; Meiotic nuclear divisions 1 homolog; Microsomal glutathione S-transferase 1; Microtubule-associated protein 1B; Myocilin; Myotilin; NECAP endocytosis associated 2; Neurensin 1; Neurocalcin delta; Neurofilament, heavy polypeptide 200kDa; Neuron specific gene family member 1; Neuropilin 1; Neurotrimin; NHP2 non-histone chromosome protein 2-like 1; Nuclear receptor subfamily 3; Nuclear receptor subfamily 4; Polymerase (RNA) II polypeptide A; Prosaposin Protein-L-isoaspartate O-methyltransferase; RAB2A, member RAS oncogene family; Radixin; Rho GTPase activating protein 29; Rho-associated, coiled-coil containing protein kinase 2; RING1 and YY1 binding protein; RNA binding motif protein 3; RNA-binding region (RNP1, RRM) containing 3; Scinderin; Serum amyloid A-like; SH3 domain binding glutamic acid-rich protein like 3; Similar to Chain D, Crystal Structure Of The Adenylyl Cyclase Domain Of Anthrax Edema Factor In Complex With Calmodulin; Similar to EBF1 protein; Similar to HMGB2 protein; Similar to Kinesin-like protein KIF3A; Similar to macrophage receptor MARCO; Similar to RIKEN cDNA 1110064P04 gene; Spi-C transcription factor; Stress-induced-phosphoprotein 1 (Hsp70/Hsp90-organizing protein) TAF9 RNA polymerase II; Tax1 binding protein 1; Tensin 3; Tetratricopeptide repeat domain 35; Topoisomerase (DNA) II alpha 170kDa; Transmembrane protein 55; TRIM6-TRIM34; Troponin C type 2; Ubiquitin carboxyl-terminal esterase L1; Voltage-dependent anion channel 1; Von Ebner minor salivary gland protein and Zinc finger protein 618.

Table S1- Gene Ontology (GO) analysis of Differentially expressed genes using GeneSifter for biological processes, cellular component and molecular function in different tissues from Chronic wastings disease infected and control brain and gut tissues of ELK.

| Brain                                     |       |    |      |                | Midbrain                                  |       |    |      |               | Thalamus                                  |       |    |      |                  |
|-------------------------------------------|-------|----|------|----------------|-------------------------------------------|-------|----|------|---------------|-------------------------------------------|-------|----|------|------------------|
| Ontology                                  | Genes | GO | List | z-score        | Ontology                                  | Genes | GO | List | z-score       | Ontology                                  | Genes | GO | List | z-score          |
| cellular process                          | 50    | 17 | 33   | 3929 -1.7 1.64 | cellular process                          | 13    | 6  | 7    | 3929 -3 0.47  | cellular process                          | 43    | 6  | 37   | 3929 -3.21 0.53  |
| biological regulation                     | 32    | 12 | 20   | 1920 0.86 1.97 | biological regulation                     | 10    | 7  | 3    | 1920 -1 -0.12 | metabolic process                         | 28    | 8  | 20   | 3035 -0.08 -2.36 |
| metabolic process                         | 31    | 14 | 17   | 3035 -0.7 -1.9 | localization                              | 9     | 6  | 3    | 1161 2 0.9    | localization                              | 25    | 4  | 21   | 1161 0.58 3.72   |
| regulation of biological process          | 29    | 11 | 18   | 1764 0.8 1.71  | regulation of biological process          | 9     | 7  | 2    | 1764 2 -0.67  | biological regulation                     | 24    | 7  | 17   | 1920 1.05 -0.13  |
| localization                              | 20    | 9  | 11   | 1161 1.42 0.93 | establishment of localization             | 7     | 5  | 2    | 1015 2 0.28   | establishment of localization             | 21    | 3  | 18   | 1015 0.19 3.27   |
| multicellular organismal process          | 20    | 6  | 14   | 987 0.45 2.77  | immune system process                     | 7     | 5  | 2    | 347 5 1.96    | multicellular organismal process          | 20    | 4  | 16   | 987 0.93 2.65    |
| signaling                                 | 17    | 2  | 15   | 976 -1.5 3.24  | metabolic process                         | 7     | 3  | 4    | 3035 -3 -0.73 | response to stimulus                      | 20    | 8  | 12   | 851 4.18 1.7     |
| cellular component organization           | 16    | 6  | 10   | 720 1.29 2.19  | positive regulation of biological process | 7     | 5  | 2    | 595 3 1.1     | regulation of biological process          | 19    | 7  | 12   | 1764 1.31 -1.26  |
| establishment of localization             | 16    | 8  | 8    | 1015 1.36 0.19 | response to stimulus                      | 7     | 5  | 2    | 851 2 0.55    | negative regulation of biological process | 13    | 6  | 7    | 595 3.73 0.74    |
| response to stimulus                      | 16    | 8  | 8    | 851 1.91 0.74  | developmental process                     | 6     | 3  | 3    | 779 1 1.65    | signaling                                 | 13    | 1  | 12   | 976 -1.12 1.19   |
| developmental process                     | 15    | 5  | 10   | 779 0.54 1.92  | multicellular organismal process          | 6     | 3  | 3    | 987 0 1.21    | developmental process                     | 12    | 3  | 9    | 779 0.69 0.8     |
| signaling process                         | 14    | 2  | 12   | 643 -0.8 3.57  | cellular component organization           | 5     | 3  | 2    | 720 1 0.81    | cellular component organization           | 11    | 2  | 9    | 720 0.06 1.05    |
| positive regulation of biological process | 13    | 5  | 8    | 595 1.18 1.83  | negative regulation of biological process | 3     | 2  | 1    | 510 1 0.18    | immune system process                     | 11    | 5  | 6    | 347 4.39 1.68    |
| negative regulation of biological process | 12    | 3  | 9    | 510 0.24 2.84  | cell proliferation                        | 2     | 1  | 1    | 290 0 0.78    | negative regulation of biological process | 11    | 3  | 8    | 510 1.48 1.67    |
| cellular component biogenesis             | 8     | 3  | 5    | 320 1.09 1.77  | cellular component biogenesis             | 2     | 2  | 0    | 320 0 -0.75   | signaling process                         | 9     | 1  | 8    | 643 -0.59 0.97   |
| immune system process                     | 8     | 4  | 4    | 347 1.72 0.92  | death                                     | 2     | 1  | 1    | 322 0 0.67    | cellular component biogenesis             | 6     | 1  | 5    | 320 0.16 1.28    |
| cell proliferation                        | 7     | 3  | 4    | 290 1.27 1.3   | locomotion                                | 2     | 1  | 1    | 174 1 1.36    | locomotion                                | 6     | 2  | 4    | 174 2.29 1.97    |
| death                                     | 7     | 1  | 6    | 322 -0.5 2.43  | signaling                                 | 2     | 0  | 2    | 976 -2 0.34   | cell proliferation                        | 5     | 1  | 4    | 290 0.26 0.87    |
| biological adhesion                       | 5     | 2  | 3    | 211 -0.9 1.18  | signaling process                         | 2     | 0  | 2    | 643 -1 0.98   | biological adhesion                       | 4     | 0  | 4    | 211 -0.24 -0.44  |
| locomotion                                | 5     | 2  | 3    | 174 1.19 1.54  | biological adhesion                       | 1     | 1  | 0    | 211 1 -0.6    | death                                     | 4     | 0  | 4    | 322 -0.96 0.66   |
| rhythmic process                          | 3     | 1  | 2    | 20 2.81 4.83   | growth                                    | 1     | 0  | 1    | 152 -1 1.52   | growth                                    | 2     | 0  | 2    | 152 -0.65 0.54   |
| growth                                    | 2     | 1  | 1    | 152 0.25 -0.1  | multi-organism process                    | 1     | 0  | 1    | 127 -1 1.75   | multi-organism process                    | 1     | 0  | 1    | 127 -0.59 -0.14  |
| multi-organism process                    | 2     | 0  | 2    | 127 -0.8 1.11  | pigmentation                              | 1     | 0  | 1    | 17 -0 5.82    | rhythmic process                          | 1     | 0  | 1    | 20 -0.23 1.93    |
| reproduction                              | 2     | 0  | 2    | 164 -0.9 0.72  | reproduction                              | 1     | 0  | 1    | 164 -1 1.43   | carbon utilization                        | 0     | 0  | 0    | 1 -0.05 -0.1     |
| reproductive process                      | 2     | 0  | 2    | 162 -0.9 0.74  | reproductive process                      | 1     | 0  | 1    | 643 -1 0.44   | cell killing                              | 0     | 0  | 0    | 21 -0.24 -0.44   |
| pigmentation                              | 1     | 0  | 1    | 17 -0.3 2.47   | rhythmic process                          | 1     | 0  | 1    | 20 -0 5.34    | cell wall organization or biogenesis      | 0     | 0  | 0    | 8 -0.15 -0.27    |
| carbon utilization                        | 0     | 0  | 0    | 1 -0.1 -0.1    | carbon utilization                        | 0     | 0  | 0    | 1 -0 -0.04    | nitrogen utilization                      | 0     | 0  | 0    | 1 -0.05 -0.1     |
| cell killing                              | 0     | 0  | 0    | 21 -0.3 -0.4   | cell killing                              | 0     | 0  | 0    | 21 -0 -0.19   | pigmentation                              | 0     | 0  | 0    | 17 -0.21 -0.4    |
| cell wall organization or biogenesis      | 0     | 0  | 0    | 8 -0.2 -0.2    | cell wall organization or biogenesis      | 0     | 0  | 0    | 8 -0 -0.12    | reproduction                              | 0     | 0  | 0    | 164 -0.68 -1.25  |
| nitrogen utilization                      | 0     | 0  | 0    | 1 -0.1 -0.1    | nitrogen utilization                      | 0     | 0  | 0    | 1 -0 -0.04    | reproductive process                      | 0     | 0  | 0    | 162 -0.67 -1.24  |
| viral reproduction                        | 0     | 0  | 0    | 14 -0.3 -0.3   | viral reproduction                        | 0     | 0  | 0    | 14 -0 -0.15   | viral reproduction                        | 0     | 0  | 0    | 14 -0.19 -0.36   |

Spleen

| Spleen                                    |        |       |    |                | Tonsil                                    |          |        |       |               | RPLN                                      |         |          |        |                  |    |      |         |
|-------------------------------------------|--------|-------|----|----------------|-------------------------------------------|----------|--------|-------|---------------|-------------------------------------------|---------|----------|--------|------------------|----|------|---------|
| Ontology                                  | Totals | Genes | GO | List           | z-score                                   | Ontology | Totals | Genes | GO            | List                                      | z-score | Ontology | Totals | Genes            | GO | List | z-score |
| cellular process                          | 67     | 45    | 22 | 3929 -0.9 -0.7 | response to stimulus                      | 14       | 9      | 5     | 851 6 3       | cellular process                          | 7       | 7        | 0      | 3929 -0.25 -2.92 |    |      |         |
| metabolic process                         | 42     | 30    | 12 | 3035 -1.9 -2.4 | cellular process                          | 12       | 5      | 7     | 3929 -3 -0.25 | metabolic process                         | 7       | 7        | 0      | 3035 0.94 -1.83  |    |      |         |
| biological regulation                     | 37     | 25    | 12 | 1920 0.44 0.2  | metabolic process                         | 11       | 6      | 5     | 3035 -0 -0.43 | response to stimulus                      | 6       | 4        | 2      | 851 2.12 3.07    |    |      |         |
| regulation of biological process          | 35     | 23    | 12 | 1764 0.42 0.56 | biological regulation                     | 7        | 3      | 4     | 1920 -1 0.3   | biological regulation                     | 5       | 4        | 1      | 1920 0.3 3.0     |    |      |         |
| response to stimulus                      | 35     | 26    | 9  | 851 5.39 1.92  | regulation of biological process          | 7        | 3      | 4     | 1764 -0 0.5   | regulation of biological process          | 5       | 4        | 1      | 1764 0.5 0.4     |    |      |         |
| multicellular organismal process          | 29     | 18    | 11 | 987 1.95 2.36  | immune system process                     | 6        | 3      | 3     | 347 3 2.05    | locomotion                                | 3       | 2        | 1      | 174 3.01 3.53    |    |      |         |
| cellular component organization           | 21     | 14    | 7  | 720 1.93 1.41  | localization                              | 5        | 1      | 4     | 1161 -1 1.44  | multicellular organismal process          | 3       | 3        | 0      | 987 0.97 -0.71   |    |      |         |
| localization                              | 21     | 10    | 11 | 1161 -1.3 1.77 | multicellular organismal process          | 5        | 3      | 2     | 987 1 0.14    | signaling                                 | 3       | 3        | 0      | 976 0.99 -0.71   |    |      |         |
| developmental process                     | 20     | 11    | 9  | 779 0.54 2.2   | positive regulation of biological process | 5        | 3      | 2     | 595 2 0.91    | biological adhesion                       | 2       | 2        | 0      | 211 2.63 -0.3    |    |      |         |
| signaling                                 | 17     | 6     | 11 | 976 -1.9 2.4   | cellular component organization           | 3        | 1      | 2     | 720 -0 0.62   | developmental process                     | 2       | 2        | 0      | 779 0.5 -0.62    |    |      |         |
| positive regulation of biological process | 15     | 9     | 6  | 595 0.7 1.39   | developmental process                     | 3        | 2      | 1     | 779 0 -0.4    | growth                                    | 2       | 2        | 0      | 152 3.29 -0.25   |    |      |         |
| establishment of localization             | 14     | 5     | 9  | 1015 -2.4 1.34 | locomotion                                | 3        | 1      | 2     | 174 1 3.01    | immune system process                     | 2       | 0        | 2      | 347 -0.83 5.1    |    |      |         |
| immune system process                     | 13     | 13    | 0  | 347 4.46 -1.5  | multi-organism process                    | 3        | 0      | 3     | 127 -1 5.78   | localization                              | 2       | 2        | 0      | 1161 -0.12 -0.79 |    |      |         |
| negative regulation of biological process | 11     | 9     | 2  | 510 1.19 -0.6  | biological adhesion                       | 2        | 1      | 1     | 211 1 1       | negative regulation of biological process | 2       | 1        | 1      | 510 0.06 1.82    |    |      |         |
| signaling process                         | 11     | 3     | 8  | 643 -1.9 2.28  | cell wall organization or biogenesis      | 2        | 0      | 2     | 8 -0 16.32    | reproduction                              | 2       | 1        | 1      | 164 1.28 3.65    |    |      |         |
| locomotion                                | 10     | 7     | 3  | 174 3.44 1.96  | death                                     | 2        | 0      | 2     | 322 -1 1.88   | reproductive process                      | 2       | 1        | 1      | 162 1.3 3.67     |    |      |         |
| cell proliferation                        | 9      | 6     | 3  | 290 1.37 0.99  | establishment of localization             | 2        | 0      | 2     | 1015 -2 0.1   | cellular component organization           | 1       | 1        | 0      | 720 -0.32 -0.59  |    |      |         |
| death                                     | 8      | 7     | 1  | 322 1.62 -0.7  | reproduction                              | 2        | 1      | 1     | 164 1 1.28    | positive regulation of biological process | 1       | 1        | 0      | 595 -0.11 -0.53  |    |      |         |
| multi-organism process                    | 7      | 4     | 3  | 127 2.01 2.61  | reproductive process                      | 2        | 1      | 1     | 162 1 1.3     | viral reproduction                        | 1       | 0        | 1      | 14 -0.16 13.1    |    |      |         |
| cellular component biogenesis             | 6      | 5     | 1  | 320 0.58 -0.7  | signaling                                 | 2        | 1      | 1     | 976 -1 -0.67  | carbon utilization                        | 0       | 0        | 0      | 1 -0.04 -0.02    |    |      |         |
| reproduction                              | 5      | 4     | 1  | 164 1.45 0.02  | cellular component biogenesis             | 1        | 0      | 1     | 320 -1 0.55   | cell killing                              | 0       | 0        | 0      | 21 -0.2 -0.09    |    |      |         |
| reproductive process                      | 5      | 4     | 1  | 162 1.48 0.03  | growth                                    | 1        | 1      | 0     | 152 1 -0.54   | cell proliferation                        | 0       | 0        | 0      | 290 -0.76 -0.36  |    |      |         |
| cell wall organization or biogenesis      | 3      | 3     | 0  | 8 9.37 -0.2    | negative regulation of biological process | 1        | 0      | 1     | 510 -1 0.06   | cell wall organization or biogenesis      | 0       | 0        | 0      | 8 -0.12 -0.06    |    |      |         |
| growth                                    | 3      | 1     | 2  | 152 -0.6 1.17  | signaling process                         | 1        | 0      | 1     | 643 -1 -0.19  | cellular component biogenesis             | 0       | 0        | 0      | 320 -0.8 -0.38   |    |      |         |
| biological adhesion                       | 2      | 1     | 1  | 211 -1 -0.2    | viral reproduction                        | 1        | 0      | 1     | 14 -0 6.06    | death                                     | 0       | 0        | 0      | 322 -0.8 -0.38   |    |      |         |
| cell killing                              | 1      | 0     | 1  | 21 -0.5 2.48   | carbon utilization                        | 0        | 0      | 0     | 1 -0 -0.04    | establishment of localization             | 0       | 0        | 0      | 1015 -1.54 -0.73 |    |      |         |
| carbon utilization                        | 0      | 0     | 0  | 1 -0.1 -0.1    | cell killing                              | 0        | 0      | 0     | 21 -0 -0.2    | multi-organism process                    | 0       | 0        | 0      | 127 -0.49 -0.23  |    |      |         |
| nitrogen utilization                      | 0      | 0     | 0  | 1 -0.1 -0.1    | cell proliferation                        | 0        | 0      | 0     | 290 -1 -0.76  | nitrogen utilization                      | 0       | 0        | 0      | 1 -0.04 -0.02    |    |      |         |
| pigmentation                              | 0      | 0     | 0  | 17 -0.5 -0.3   | nitrogen utilization                      | 0        | 0      | 0     | 1 -0 -0.04    | pigmentation                              | 0       | 0        | 0      | 17 -0.18 -0.08   |    |      |         |
| rhythmic process                          | 0      | 0     | 0  | 20 -0.5 -0.4   | pigmentation                              | 0        | 0      | 0     | 17 -0 -0.18   | rhythmic process                          | 0       | 0        | 0      | 20 -0.19 -0.09   |    |      |         |
| viral reproduction                        | 0      | 0     | 0  | 14 -0.4 -0.3   | rhythmic process                          | 0        | 0      | 0     | 20 -0 -0.19   | signaling process                         | 0       | 0        | 0      | 643 -1.17 -0.55  |    |      |         |

**Table S2 - Summary of Ingenuity networks generated by mapping of differentially expressed genes identified from Chronic wastings disease infected and control brain and gut tissues of Elk.**

| Brain           | Genes in Network                                                                                                                                                                                                                                                                                                                                                | Score | Focus Genes | Top Functions                                                                                         |
|-----------------|-----------------------------------------------------------------------------------------------------------------------------------------------------------------------------------------------------------------------------------------------------------------------------------------------------------------------------------------------------------------|-------|-------------|-------------------------------------------------------------------------------------------------------|
| 1               | 26s Proteasome, Actin, Calmodulin, CAPZA2, CDKN1C, CS, ERMN, F Actin, GD11, GNAS, GPNMB, Histone h3, ID2, LCP1, MAG, MAPK3, MT1F, NEFH, NEFM, NRAA2, NTM, PCP4, POLR2A, PRPH, RDX, Rho gdi, RHOB, SCIN, SDCBP, SNAP25, SNCA, SOD1, TAC1, TAX1BP1, Tubulin                                                                                                       | 67    | 28          | Neurological Disease, Cell Morphology, Cellular Assembly and Organization                             |
| 2               | ATAD2, ATP, CDKN2A, CEBPB, CTRP, CTRAT, CXCL2, FGF7, GNAI1, GNAI3, GPD1, GPSM3, HNF4A, HP, KCN12, KIT, MAP3K3, MAPK8, OGFOD2, PCP2, PEPO, PLEKH8, PLOD1, PPARG, PROZ, PTPLAD1, RAB2A, SORL1 (includes EG:58472), SYT4, TBRG1, TCF19, TMEM176A, TMEM176B, TTR                                                                                                    | 24    | 13          | Cell Cycle, Genetic Disorder, Cancer                                                                  |
| 3               | ASC2, C3AR1, CALCB (includes EG:797), CALCRL, CD68, COL11A1, COL24A1, COL8A2, CTSH, EGR2, EVI2A, EVX1, FEZ2, FOS, GPR18, HOXA9, JUN, MT1A, NBP1, PCDHGC3, PCNX, PPA1, PTGDS, RCHY1, RGS1, SATB1, SCN3B, SULF2, TAOK1, TLN2, TMSB10, TP53, TP53AIP1, YY2 (includes EG:404281), ZFP36L1                                                                           | 21    | 12          | Cell Cycle, Gene Expression, Cell Death                                                               |
| 4               | Basal transcriptional machinery, Cbp/p300-Hd-Taf4-Taf9b-Tbg, COT6B, CHN1 (includes EG:1123), CHN1, CPNE5, CREBBP, CRYGF, CYR61, EBF1, EDN1, EID1, EP300, ERBB2, HTT, Irf alpha/beta, LSAMP, Mediator, MOG, N4BP2, NPTN, NTM, OPCML, p160, p300-CBP, PRNP, RETN, RNPC3, SEPT7, SH3BGR1, SS18L1, STRN, TGS1, TIF2-NCOA1-p300-PCAF-CBP, TRERF1                     | 19    | 11          | Cellular Function and Maintenance, Neurological Disease, Cancer                                       |
| 5               | ABCC1, AEBP2, ATP2A1, BRD8, BRWD1, Ca2+, CDH11, EEF2, H3F3A (includes EG:3020), HBG1, HLTf, HRC, IKZF3, JARID2, JPH1, LCAT, MI2, MKL1, MORC3, MTF2, MYCN, MYH7, RBBP4, RCOR1, RFC3, RPS15, SERPINH1, SETX, SMARCA4, SP3, SPARC, STK38, TAGLN, TRIM35, VSNL1                                                                                                     | 13    | 8           | Cell Cycle, Cellular Assembly and Organization, DNA Replication, Recombination, and Repair            |
| <b>Midbrain</b> |                                                                                                                                                                                                                                                                                                                                                                 |       |             |                                                                                                       |
| 1               | CALCRL, Calmodulin, CEBPB, COL1A1, CP, CTSH, EDNRB, Gpcr, GPR55, GPR84, GPR113, GPR120, GPR144, GPR173, GPR174, GPR176, GPR89A, GPR89C, GPRC6A, GRK5, GSTA1, HLA-DRA, HLA-DRB1, HSPD1, HTT, ITGA11, LCP1, LGR4, LPAR6, OPN1MW2, SCN3B, SEPT7, TAA8, TP53, VN1B3                                                                                                 | 26    | 11          | Neurological Disease, Cell Death, Organismal Survival                                                 |
| 2               | A2M, AQP4, ARG2, ARHGEF40, ATP6V1D, C11ORF51, C11ORF58, CCDC25, CD68, CYP2J2, DMD, GAS1, GSS, HNF4A, IFI30, IFITM2, JUN, KCN12, LOC729991-MEF2B, MAL2, MAP3K3, MAP3K13, MGST1, MGST2, MGST3, MIRLET7B (includes EG:406884), MT1F, MTF1, REG1B, SCIN, SLC39A9, SMAD2, SOD1, STAT3, ZNHIT6                                                                        | 24    | 10          | Hepatic System Disease, Liver Cholestasis, Gene Expression                                            |
| <b>Thalamus</b> |                                                                                                                                                                                                                                                                                                                                                                 |       |             |                                                                                                       |
| 1               | A2M, Beta Tubulin, Calmodulin, Calmodulin-Ca2+-CaMKII+Calmodulin-Ca2+, Calmodulin-CaMKII-Ca2+, Calmodulin-CaMKII-Ca2+, CAMK2B, CCK, CXCL2, FCRL6, GAP43, GAPDH (includes EG:2597), HLA-DRA, HLA-DRB1, MAP6, N-cor, NCALD, NFkB (complex), NHP2L1, NTM, PCP4, Pgc, PGK1, SNAP25, SNAP91, SNCA, STMN2, TAC1, TAF9, THY1, TUBB4Q, Tubulin, UCHL1, VDAC1, ZDHHC7    | 49    | 22          | Genetic Disorder, Neurological Disease, Psychological Disorders                                       |
| 2               | ABCC6, ATL1, C16ORF80, C3ORF34, CHMP1B, DAD1, FKBP10, FKBP1B, GINS2, GINS4, HNF4A, HNF4a dimer, MDH1, MDH2, NAT8, NDUFB5, PCMT1, PGAM1, PPARGC1A, PPL1, PPL2, PPP1CA, PPP1R1, PPP1R14D, PPP1R15B, PPP1R3B, PVALB, RAB33B, SLC25A20, SLC26A11, SPAST, STT3A, TGFBR1, TUSC3, WDR13                                                                                | 20    | 11          | Gene Expression, Energy Production, Small Molecule Biochemistry                                       |
| 3               | ADRB2, AVP, CD68, CTSH, FOS, GFIB, GNB5, Gpcr, GPR55, GPR84, GPR113, GPR120, GPR144, GPR173, GPR174, GPR176, GPR89A, GPR89C, GPRC6A, IKBKG, JUN, KIFAP3, LGR4, LPAR6, MAPK10, NELL2, NTS, OPN1MW2, SEKN1, SRC, TAA8, TAF1, VN1B2, VN1B3, VSNL1                                                                                                                  | 18    | 10          | Cancer, Gene Expression, Genetic Disorder                                                             |
| 4               | ANGPTL4, ATP1B1, ATP6V1C1, ATP6V1C2, AXIN2, BHLHE41, CA9, CHD8, CP, CTNNB1, EDN1, EDN3, Endothelin, FOXP3, HIF1A, HP, KCNIP4, LPIN1, MB, MIR122 (includes EG:406906), MPO, NAA10, nitric oxide, NRN1, NT5E, p160, PPARG, RGS1, SCD, SCG2, SMAD7, TGFB3, TNF, TTR                                                                                                | 16    | 10          | Organismal Injury and Abnormalities, Cellular Development, Connective Tissue Development and Function |
| <b>Spleen</b>   |                                                                                                                                                                                                                                                                                                                                                                 |       |             |                                                                                                       |
| 1               | A2M, Ap1, APP, BLNK, CAMP, CCNB1, CD69, CENPF, CFB, CKM, FABP4, HBB (includes EG:3043), Histone h3, Histone h4, HMGN1, HP, Hsp70, JUN, KIAA0101, KRT19, Laminin, MIF, MME, Mmp, MMP7, NCAPG (includes EG:64151), NFkB (complex), PCNA, RNA polymerase II, RRM2, SAA1, SMC4, SPP1, TOP2A, Ubiquitin                                                              | 51    | 26          | Cancer, Reproductive System Disease, Cell Death                                                       |
| 2               | ACTG2 (includes EG:72), Actin, ALKBH8, BASP1, CALD1, Calmodulin, CAPZA2, CCL2, CCL20, CHEMOKINE, CXCL10, CXCL14, CXCR4, DNAJB1, Estrogen Receptor, F Actin, Hsp90, HSP90AA1, HSPA8, IQGAP1, MAP1B, Mic, MYH8, MYH10, MYL1, Myosin, ROCK2, S100A9, SHCBP1, SPA17, SPTA1, SPTB1, STMN2, Tubb1                                                                     | 49    | 26          | Cellular Movement, Hematological System Development and Function, Immune Cell Trafficking             |
| 3               | ADH1C, AZGP1, BMP24, C20ORF114, CSR3, DES, EBF1, EGF, FGF6, FGFRL1, FLT4, GHR, GPNMB, growth factor receptor, H2-M1, IKBIP, KIF11, KIT, LTF, MYO1, NTRK2, PLC gamma, PLUNC, POSTN, PSAP, RXRA, SPIC, TAC1, TCF3, TCN1, TFE2, TGFBR3, TNFSE13B, TNNI2, WDR2                                                                                                      | 28    | 16          | Cancer, Reproductive System Disease, Molecular Transport                                              |
| 4               | AGTR1, AKT1, ARHGAP15, ARHGAP29, ARHGAP10, ARRB2, BIRC3, CASP3, CASP3/67, CFI, CHN2, Ciap, COX7A2L, ELOVL1, FPR1, HTR2B, KCNAB1, MGST3, MIR124, NDRG2, NECAP2, ONECUT1, PIK3R1, RGS13, RPL28, RPS6KB2, RRH, SLC1A3, SLC25A13, SNCA, SNCB, TGFBR1, TMOC2, TP53, UBE2                                                                                             | 21    | 13          | Cell Death, Cancer, Cellular Movement                                                                 |
| 5               | CK1, FBLN1, FLNA, FLNC, FRZB, FZD1, FZD3, FZD10, GPR39, GPR137, GPR146, GPR160, HMG1 (includes EG:3146), HNF4A, INHBE, LTB4R2, MAL2, MRPS18B, MYOC, MYOT, NUF2, OTUD1, P2RY14, PHLD2, PSAT1, RANBP1, RB1, RBAK, RBBP9, SGCB, SGCE, SLC22A18A5, UCHL1, VN1B1, WNT11                                                                                              | 19    | 12          | Cellular Assembly and Organization, Cancer, Cardiovascular System Development and Function            |
| 6               | ANGPT1, ATXN1, BRCA1, BTAF1, CHRDL1, DIAPH3, DNAJA1, DNAJB3 (includes EG:414061), DNAJC2, DNAJC12, DNAJC22, DNAJC24, DNAJC25, DNAJC27, DNAJC28, DNAJC30, EAF2, ELL3, GBP2, GTF2F2L, HELLS, Holo RNA polymerase II, HSP, HSPA12A, HSPA12B, HSPB11, HSPH1, KLHL8, MIRLET7E (includes EG:406887), MYC, POLR2J2, POLR2L (includes EG:64491), SLMAP, TAF9B, TGF5A    | 18    | 11          | Gene Expression, Infection Mechanism, Cell Cycle                                                      |
| 7               | AGR2, AK1, CACYBP, CTSH, DUT (includes EG:1854), EGFR, EMCN, FHL2, FOS, IL4, IL7, KBTBD10, MED31, MT1A, MUC2, MUC4, MUC6, MUC12 (includes EG:10071), MUC3A (includes EG:4584), MUC3A (includes EG:687030), MUC5AC, Mucin, MYBPC1, NUT2, PERP, PROL1 (includes EG:17830), RPS25, SCAMP1, SELENBP1, SIGLEC9, SPARCL1, TFF3, TMCO3, TP53, YY2 (includes EG:404281) | 15    | 10          | Cell Cycle, Cellular Development, Cellular Growth and Proliferation                                   |
| <b>RPLN</b>     |                                                                                                                                                                                                                                                                                                                                                                 |       |             |                                                                                                       |
| 1               | CACYBP, CCL5, CDK6, CEBPA, CTGF, CTNNB1, CYR61, DNAJA1, DNAJB1, DNAJB7, DNAJB13, DNAJB3 (includes EG:414061), DNAJC2, DNAJC12, DNAJC15, DNAJC22, DNAJC24, DNAJC25, DNAJC27, DNAJC28, DNAJC30, DNAJC5B, FBXO7, FMR1, FOS, HLA-B, HP, HSP, HSPA12A, HSPA12B, HSPB11, HSPH1, KLRC1, RGS13, SP1                                                                     | 33    | 12          | Infection Mechanism, Cellular Assembly and Organization, Organ Development                            |
| <b>Tonsil</b>   |                                                                                                                                                                                                                                                                                                                                                                 |       |             |                                                                                                       |
| 1               | C4BPA, CAPZA2, CCL21, CD163, CLTC, DNAJA1, DNAJB1, DNAJB7, DNAJB13, DNAJB3 (includes EG:414061), DNAJC2, DNAJC12, DNAJC22, DNAJC24, DNAJC25, DNAJC27, DNAJC28, DNAJC30, DNAJC5B, heparin, HSP, HSPA12A, HSPA12B, HSPB11, HSPH1, IL8, NFKBIA, PERP, PRKCA, RBX1 (includes EG:56438), S100A9, S100A12, SPRR3 (includes EG:6707), TP53, Ubiquitin                  | 32    | 13          | Infection Mechanism, Hematological Disease, Organismal Injury and Abnormalities                       |
| 2               | ASCB1, AKAP12, APPL1, AXIN2, C12ORF53, CBFA2T3, CIR1, CTNNB1, CXADR, CYR61, DKK1, FABP2, FABP4, FGF8P1, HDAC1, HDAC7, HDAC10, HESX1, IGF2BP2, INPP5A, INPP5K, LPIN1, MDF1 (includes EG:4188), MI2, MIR34C (includes EG:407042), MTA3, NCOR2, SALL1, SOX6, SOX17, SPEN, TBL1X, TFAP4, UHRE2, ZBTB7A                                                              | 12    | 6           | Cellular Development, Cellular Growth and Proliferation, Gene Expression                              |

All the potential networks that scored > 9 are listed (a score of 3 or greater is considered significant with p<0.001).

**Table S3 - Major canonical pathways (top 5) over-represented by differentially expressed genes from Chronic wastings disease infected and control brain and gut tissues of Elk as determined using the Ingenuity Pathway Analysis.**

|                 | <b>Ingenuity Canonical Pathways</b>                  | <b>-log(p-value)</b> | <b>Ratio</b> | <b>Molecules</b>                                                 |
|-----------------|------------------------------------------------------|----------------------|--------------|------------------------------------------------------------------|
| <b>Brain</b>    |                                                      |                      |              |                                                                  |
|                 | Amyotrophic Lateral Sclerosis Signaling              | 2.79E+00             | 3.39E-02     | PRPH, SOD1, NEFM, NEFH                                           |
|                 | Endothelin-1 Signaling                               | 2.70E+00             | 2.60E-02     | GNAS, LCAT, EDN1, MAPK3, GNAI1                                   |
|                 | Androgen Signaling                                   | 2.57E+00             | 2.76E-02     | GNAS, POLR2A, MAPK3, GNAI1                                       |
|                 | Synaptic Long Term Depression                        | 2.20E+00             | 2.45E-02     | GNAS, LCAT, MAPK3, GNAI1                                         |
|                 | CXCR4 Signaling                                      | 2.08E+00             | 2.34E-02     | GNAS, RHOB, MAPK3, GNAI1                                         |
| <b>Midbrain</b> |                                                      |                      |              |                                                                  |
|                 | B Cell Development                                   | 2.83E+00             | 5.41E-02     | HLA-DRA, HLA-DRB1                                                |
|                 | Antigen Presentation Pathway                         | 2.73E+00             | 4.65E-02     | HLA-DRA, HLA-DRB1                                                |
|                 | Graft-versus-Host Disease Signaling                  | 2.61E+00             | 4.00E-02     | HLA-DRA, HLA-DRB1                                                |
|                 | Autoimmune Thyroid Disease Signaling                 | 2.60E+00             | 3.28E-02     | HLA-DRA, HLA-DRB1                                                |
|                 | NRF2-mediated Oxidative Stress Resp                  | 2.54E+00             | 1.56E-02     | MGST1, SOD1, GSTA1                                               |
| <b>Thalamus</b> |                                                      |                      |              |                                                                  |
|                 | Parkinson's Signaling                                | 2.63E+00             | 1.11E-01     | UCHL1, SNCA                                                      |
|                 | OX40 Signaling Pathway                               | 2.28E+00             | 3.12E-02     | HLA-DRA, MAPK10, HLA-DRB1                                        |
|                 | Acute Phase Response Signaling                       | 2.27E+00             | 2.19E-02     | TTR, HP, CP, A2M                                                 |
|                 | Crosstalk between Dendritic Cells and IL-6 Signaling | 2.20E+00             | 3.06E-02     | HLA-DRA, HLA-DRB1, CAMK2B                                        |
|                 |                                                      | 2.19E+00             | 3.00E-02     | MAPK10, CD14, A2M                                                |
| <b>Spleen</b>   |                                                      |                      |              |                                                                  |
|                 | Hepatic Fibrosis / Hepatic Stellate Cell Activation  | 2.99E+00             | 4.08E-02     | MYH10, CCL2, MYH8, A2M, MYL1, AGTR1                              |
|                 | Protein Ubiquitination Pathway                       | 2.86E+00             | 2.92E-02     | UCHL1, UBD, HSPA8, HSPH1, HSP90AA1, DNAJB1, DNAJA1, BIRC3        |
|                 | Actin Cytoskeleton Signaling                         | 2.73E+00             | 2.94E-02     | ROCK2, MYH10, MYH8, DIAPH3, ACTG2 (includes EG:72), IQGAP1, MYL1 |
|                 | Chemokine Signaling                                  | 2.56E+00             | 5.33E-02     | ROCK2, JUN, CCL2, CXCR4                                          |
|                 | Aldosterone Signaling in Epithelial Cells            | 2.05E+00             | 2.91E-02     | HSPA8, HSPH1, HSP90AA1, DNAJB1, DNAJA1                           |
| <b>RPLN</b>     |                                                      |                      |              |                                                                  |
|                 | Aldosterone Signaling in Epithelial Cell             | 3.44E+00             | 1.74E-02     | HSPH1, DNAJB1, DNAJA1                                            |
|                 | Protein Ubiquitination Pathway                       | 2.78E+00             | 1.09E-02     | HSPH1, DNAJB1, DNAJA1                                            |
|                 | IGF-1 Signaling                                      | 2.49E+00             | 2.00E-02     | CTGF, CYR61                                                      |
|                 | Role of Tissue Factor in Cancer                      | 2.33E+00             | 1.72E-02     | CTGF, CYR61                                                      |
|                 | Hepatic Fibrosis / Hepatic Stellate Cell             | 2.14E+00             | 1.36E-02     | CTGF, CCL5                                                       |
| <b>Tonsil</b>   |                                                      |                      |              |                                                                  |
|                 | Aldosterone Signaling in Epithelial Cell             | 2.84E+00             | 1.74E-02     | HSPH1, DNAJB1, DNAJA1                                            |
|                 | Protein Ubiquitination Pathway                       | 2.20E+00             | 1.09E-02     | HSPH1, DNAJB1, DNAJA1                                            |
|                 | Role of Tissue Factor in Cancer                      | 1.94E+00             | 1.72E-02     | IL8, CYR61                                                       |
|                 | Airway Pathology in Chronic Obstructiv               | 1.93E+00             | 1.11E-01     | IL8                                                              |
|                 | Hepatic Fibrosis / Hepatic Stellate Cell             | 1.75E+00             | 1.36E-02     | IL8, CCL21                                                       |

**Table S4. Differentially expressed genes associated with CWD in Elk. These genes have not been reported to be associated to TSE disease in previous studies.**

|                                                      |
|------------------------------------------------------|
| Acyloxyacyl hydrolase                                |
| Angiopoietin 1                                       |
| Angiotensin II receptor                              |
| ATPase, H <sup>+</sup> transporting, lysosomal 42kDa |
| Baculoviral IAP repeat-containing 3                  |
| Cadherin 18, type 2                                  |
| Calcyon neuron-specific vesicular protein            |
| Caldesmon 1                                          |
| Calponin 1                                           |
| Carboxypeptidase E                                   |
| Cathelicidin                                         |
| Caveolin 1                                           |
| CD163 molecule                                       |
| CDC28 protein kinase regulatory subunit 2            |
| Ceruloplasmin                                        |
| Chimerin 1                                           |
| Cholecystokinin                                      |
| Common salivary protein BSP30                        |
| Complement component 4A                              |
| Complement factor B and H                            |
| Connective tissue growth factor CTD                  |
| Cyclin-dependent kinase inhibitor 1C                 |
| Cysteine and glycine-rich protein                    |
| Cysteine-rich, angiogenic inducer                    |
| Cytokeratin 19                                       |
| Deleted in malignant brain tumors 1                  |
| Destrin                                              |
| Elongation factor RNA polymerase II                  |
| Ermin                                                |
| Fatty acid binding protein 4                         |
| Fibroblast growth factor 12                          |
| Fibroblast growth factor-binding protein             |
| Frizzled-related protein                             |
| GDP dissociation inhibitor 1                         |
| GINS complex subunit 4                               |
| GNAS complex locus                                   |
| Growth hormone receptor                              |
| GTP-binding protein 8                                |
| Haptoglobin                                          |
| Heme oxygenase 1                                     |
| Hemoglobin alpha chain Fc fragment of IgG            |
| Hemoglobin, beta                                     |
| Intersectin 1                                        |
| IQ motif containing GTPase activating protein 1      |
| Kv channel interacting protein 4                     |
| Mal, T-cell differentiation protein 2                |
| Meiotic nuclear divisions 1 homolog                  |
| Microsomal glutathione S-transferase 1               |
| Microtubule-associated protein 1B                    |
| Myocilin                                             |
| Myotilin                                             |

|                                                                                                                         |
|-------------------------------------------------------------------------------------------------------------------------|
| NECAP endocytosis associated 2                                                                                          |
| Neurensin 1                                                                                                             |
| Neurocalcin delta                                                                                                       |
| Neurofilament, heavy polypeptide 200kDa                                                                                 |
| Neuron specific gene family member 1                                                                                    |
| Neuropilin 1                                                                                                            |
| Neurotrimin                                                                                                             |
| NHP2 non-histone chromosome protein 2-like 1                                                                            |
| Nuclear receptor subfamily 3                                                                                            |
| Nuclear receptor subfamily 4                                                                                            |
| Polymerase (RNA) II polypeptide A                                                                                       |
| Prosaposin Protein-L-isoaspartate O-methyltransferase                                                                   |
| RAB2A, member RAS oncogene family                                                                                       |
| Radixin                                                                                                                 |
| Rho GTPase activating protein 29                                                                                        |
| Rho-associated, coiled-coil containing protein kinase 2                                                                 |
| RING1 and YY1 binding protein                                                                                           |
| RNA binding motif protein 3                                                                                             |
| RNA-binding region (RNP1, RRM) containing 3                                                                             |
| Scinderin                                                                                                               |
| Serum amyloid A-like                                                                                                    |
| SH3 domain binding glutamic acid-rich protein like 3                                                                    |
| Similar to Chain D, Crystal Structure Of The Adenylyl Cyclase Domain Of Anthrax Edema Factor In Complex With Calmodulin |
| Similar to EBF1 protein                                                                                                 |
| Similar to HMGB2 protein                                                                                                |
| Similar to Kinesin-like protein KIF3A                                                                                   |
| Similar to macrophage receptor MARCO                                                                                    |
| Similar to RIKEN cDNA 1110064P04 gene                                                                                   |
| Spi-C transcription factor                                                                                              |
| Stress-induced-phosphoprotein 1 (Hsp70/Hsp90-organizing protein) TAF9 RNA polymerase II                                 |
| Tax1 binding protein 1                                                                                                  |
| Tensin 3                                                                                                                |
| Tetratricopeptide repeat domain 35                                                                                      |
| Topoisomerase (DNA) II alpha 170kDa                                                                                     |
| Transmembrane protein 55                                                                                                |
| TRIM6-TRIM34                                                                                                            |
| Troponin C type 2                                                                                                       |
| Ubiquitin carboxyl-terminal esterase L1                                                                                 |
| Voltage-dependent anion channel 1                                                                                       |
| Von Ebner minor salivary gland protein and Zinc finger protein 618                                                      |
|                                                                                                                         |
